# Supplementary material
Source: publisher site journal article supplement (https://www.spandidos-publications.com/4293/downloadSupplementary)
Supplement: Supplementary file 1 [file downloadSupplementary]

## Sheet: Supplementary File 4
Table SVII. The top 5 GO terms enriched in the upregulated genes in the siDEK-treated cells
Term	Database	ID	Input number	Background number	P-value	Corrected P-Value	Input	Hyperlink
Extracellular matrix organization	Gene Ontology	GO:0030198	7	312	5.59e-07	2.79e-06	MATN1|EMILIN1|ITGA2B|CCDC80|MMP19|LAMC3|C6orf15	http://amigo.geneontology.org/amigo/term/GO:0030198
Cell adhesion	Gene Ontology	GO:0007155	6	445	7.33e-05	0.000183283	CDH15|CCL4|EMILIN1|ITGA2B|CD22|LAMC3	http://amigo.geneontology.org/amigo/term/GO:0007155
Signal transduction	Gene Ontology	GO:0007165	7	1045	0.00125201	0.00208668	APBB1IP|CCL4|ASIC3|TNFRSF10C|WNT8B|FLT3LG|CXCL10	http://amigo.geneontology.org/amigo/term/GO:0007165
Transmembrane transport	Gene Ontology	GO:0055085	5	578	0.00236449	0.00295562	SLC4A5|SPNS3|HMOX1|ABCC2|ASIC3	http://amigo.geneontology.org/amigo/term/GO:0055085
Transcription, DNA-dependent	Gene Ontology	GO:0006351	5	1857	0.191297	0.191297	PRDM16|HDAC9|BATF2|CIDEC|ABLIM2	http://amigo.geneontology.org/amigo/term/GO:0006351
